# Supplementary material for: Does Emotional Working Memory Training Ameliorate Anxiety and Depression? A Meta-Analytic Review
Source: Research Square preprint supplement (doi:10.21203/rs.3.rs-7409661/v1), 2025-09-23
Supplement: Supplementary file 1 [file 448dc28c986a369a049e7a4e.pdf]

Supplement 1. Funnel Plots for Meta-Analyses

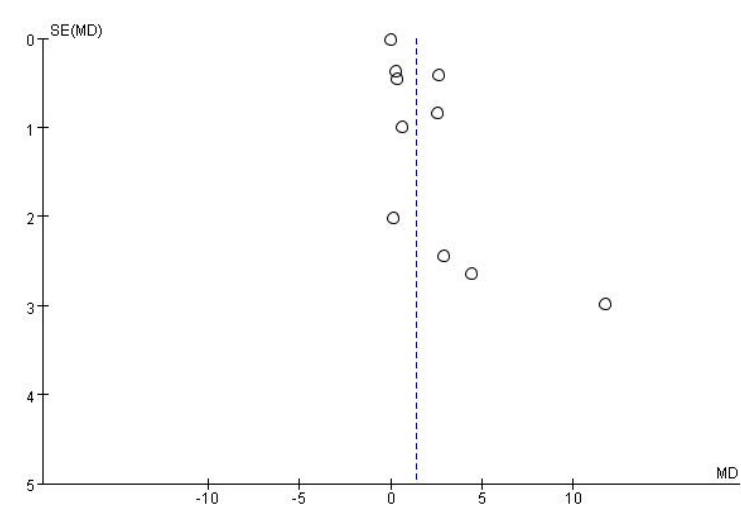

Funnel Plots for eWMT on working memory capacity

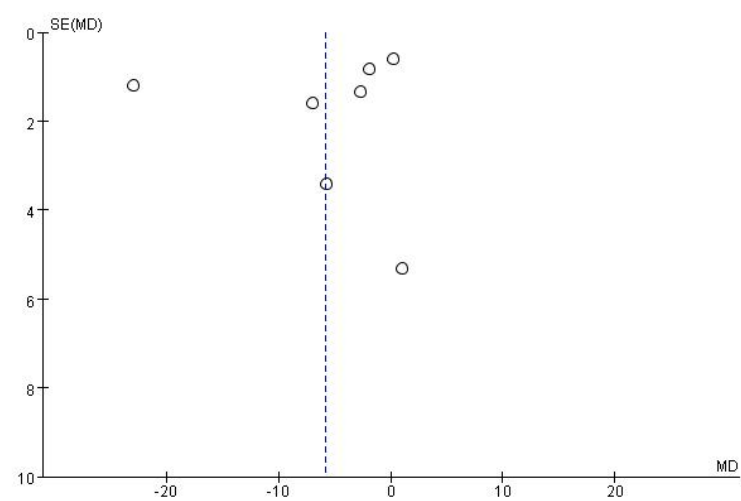

Funnel Plots for eWMT on anxiety

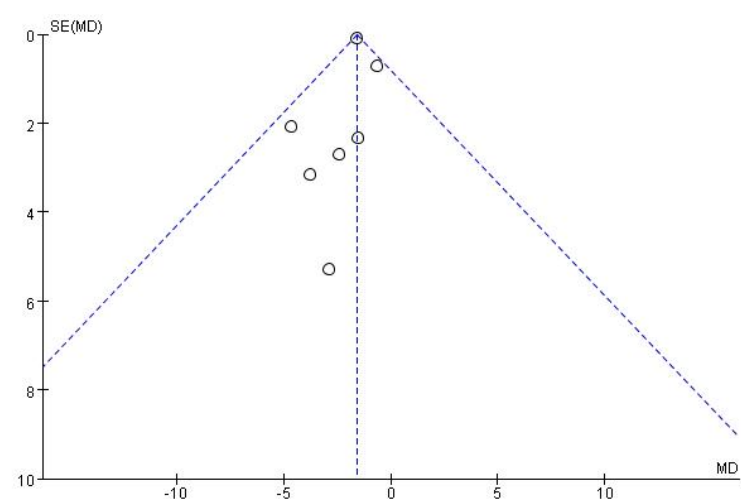

Funnel Plots for eWMT on depression

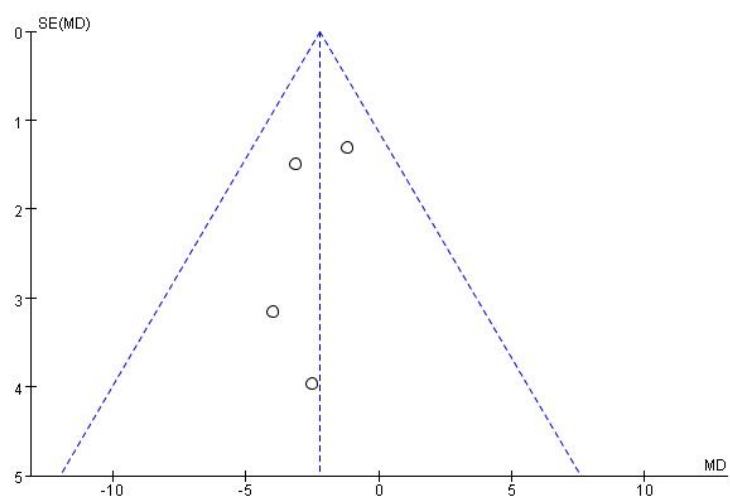

Funnel Plots for eWMT on Rumination

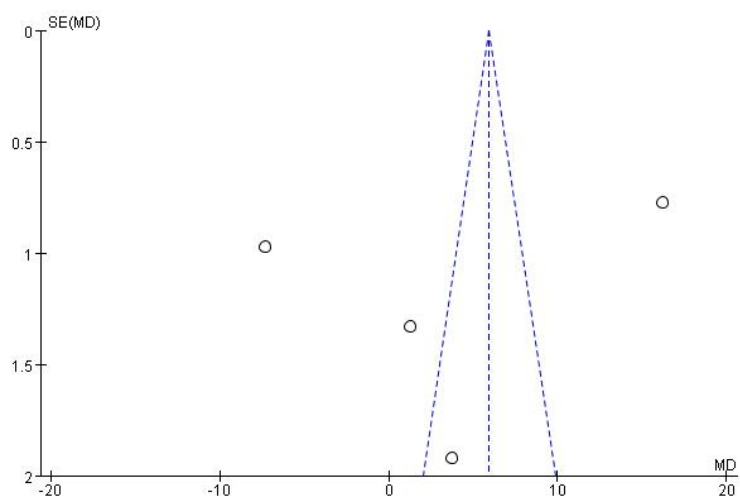

Funnel Plots for eWMT on Reappraisal
